# Supplementary material for: RETRACTED ARTICLE: Effect of rosuvastatin on fasting and postprandial endothelial biomarker levels and microvascular reactivity in patients with type 2 diabetes and dyslipidemia: a preliminary report
Source: Springer Nature journal article supplement (doi:10.1186/s12933-017-0629-0), 2017-11-09
Supplement: MOESM1 [file 15209924]

| **Table S1 Amount and percentage* of nutritional components contained in 100 mL of a can of New Care** | | | | | |
| --- | --- | --- | --- | --- | --- |
|  | Amount/100 mL | Percent* |  | Amount/100 mL | Percent* |
| Calorie (kcal) | 100 | - | Copper (mg) | 0.2 | 25 |
| Carbohydrate (g) | 14 | 4 | Manganese (mg) | 0.4 | 13 |
| Sugar (g) | 0.7 | - | Vitamin A (μg) | 90 | 13 |
| Fiber (g) | 1.5 | 6 | Vitamin B1 (mg) | 0.13 | 11 |
| Protein (g) | 4 | 7 | Vitamin B2 (mg) | 0.18 | 13 |
| Fat (g) | 3.5 | 7 | Vitamin B6 (mg) | 0.18 | 12 |
| Saturated fat (g) | 0.9 | 6 | Vitamin B12 (μg) | 0.24 | 10 |
| Trans fat (g) | 0 | 0 | Vitamin C (mg) | 20 | 20 |
| Cholesterol (mg) | 0 | 0 | Vitamin D (μg) | 1 | 20 |
| Sodium (mg) | 90 | 5 | Vitamin E (mg) | 1 | 9 |
| Calcium (mg) | 70 | 10 | Vitamin K (μg) | 8 | 11 |
| Phosphorus (mg) | 70 | 10 | Folate (μg) | 45 | 11 |
| Potassium (mg) | 150 | 4 | Niacin (mg) | 3 | 20 |
| Magnesium (mg) | 20 | 6 | Pantothenic acid (mg) | 0.7 | 14 |
| Iron (mg) | 1.1 | 9 | Biotin (μg) | 3.2 | 11 |
| Zinc (mg) | 1.3 | 15 | Selenium (μg) | 3 | 5 |
| Iodine (mg) | 11 | 7 | Chromium (μg) | 3 | 6 |
| Chloride (mg) | 120 | 5 | Molybdenum (μg) | 1.5 | 6 |
| *Percent based on recommended daily amount | | | | | |
